# Supplementary material for: Changes of the Membrane Lipid Organization Characterized by Means of a New Cholesterol-Pyrene Probe
Source: PubMed Central journal article supplement — Biophys J. 2007 Aug 31;93(12):4462–73. doi: 10.1529/biophysj.107.112821 (PMC2098716; doi:10.1529/biophysj.107.112821), 2007-08-31
Supplement: biophysj_107.112821_1.pdf [file biophysj_107.112821_1.pdf]

# Changes of the membrane lipid organization characterized by means of a new cholesterol-pyrene probe

*Laurent Le Guyader\**, *Christophe Le Roux<sup>†</sup>*, *Serge Mazères\**, *Hafida Gaspard-Iloughmane<sup>‡</sup>*,  
*Heinz Gornitzka<sup>‡</sup>*, *Claire Millot\**, *Christophe Mingotaud<sup>‡</sup>* and *André Lopez\**.

\*Institut de Pharmacologie et de Biologie Structurale UMR 5089, 205 route de Narbonne, 31077 Toulouse Cedex, France. <sup>†</sup>Laboratoire d'Hétérochimie Fondamentale et Appliquée, UMR 5069 and <sup>‡</sup>Laboratoire des Interactions Moléculaires et Réactivité Chimique et Photochimique, UMR 5623, Université Paul Sabatier, 118 route de Narbonne, 31062 Toulouse Cedex 4, France.

Correspondence: André Lopez: Tel: +33(0) 561 175 945, Fax: +33(0) 561 175 994, E-mail: andre.lopez@ipbs.fr

## Supplementary Materials

---

**Scheme 1.** Organic synthesis of cholesterol-pyrene probe.

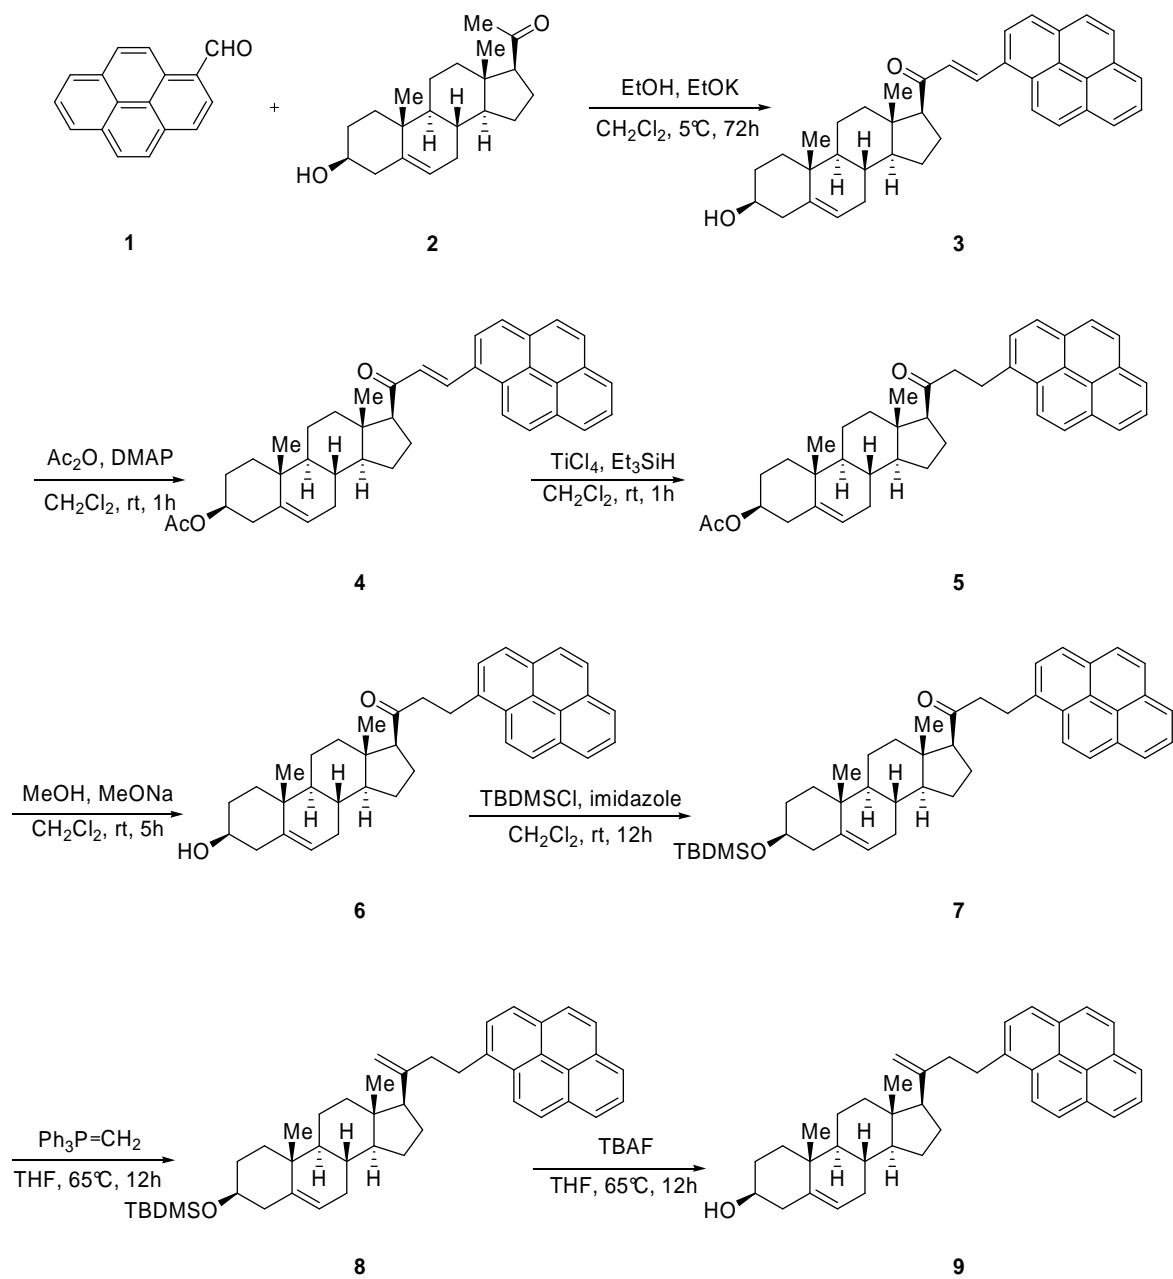

Synthesis procedures, spectral and analytical characterizations of cholesterol probe in Scheme 1:

**(21E)-3 $\beta$ -hydroxy-pregna-5,21-diene-22-(1-pyrenyl)-20-one (3).** Fifteen mL of dry ethanol and then 25 mL of a 24 wt. % solution of potassium ethanolate in ethanol were added to a solution of 1-pyrenecarboxaldehyde (**1**) (3.2 g, 14 mmol) and pregnenolone (**2**) (4 g, 12.64 mmol) in 30 mL of dry CH<sub>2</sub>Cl<sub>2</sub>. The resulting solution was stirred for 72 h at +5°C, 200 mL of water was added and the mixture was extracted with CH<sub>2</sub>Cl<sub>2</sub> (3 x 100 mL). The combined organic extracts were washed with saline solution, dried over sodium sulfate, filtered and concentrated on a rotatory evaporator. The crude product was purified by flash chromatography on silica G60 (0.040-0.063 mm), eluting with ethyl acetate in CH<sub>2</sub>Cl<sub>2</sub> (2/98) then with ethyl acetate in CH<sub>2</sub>Cl<sub>2</sub> (15/85) to give 6.12g (91%) of **3** as a bright yellow solid; mp: 153°C; TLC (CH<sub>2</sub>Cl<sub>2</sub>/AcOEt 15:85) R<sub>f</sub> 0.5; IR (KBr, cm<sup>-1</sup>) 3300m, 2932s, 1676m, 1590s, 1436w, 1370w, 1352w, 1315w, 1234w, 1192w, 1102m, 1052m, 973w, 848s, 709w; <sup>1</sup>H NMR (CDCl<sub>3</sub>)  $\delta$  0.59 (s, 3H), 0.87 (s, 3H), 0.70-2.38 (m, 22H), 2.73 (t, J = 8.7 Hz, 1H), 3.42 (sept, J = 4.8 Hz, 1H) 3.55 (t, J = 9 Hz, 2H), 5.24 (d, J = 4.8 Hz, 1H), 6.87 (d, J = 15.6 Hz, 1H), 7.87-8.17 (m, 8H), 8.36 (d, J = 9.3 Hz, 1H), 8.58 (d, J = 15.6 Hz, 1H); <sup>13</sup>C NMR (CDCl<sub>3</sub>)  $\delta$  200.2, 140.8, 138.0, 132.7, 131.3, 130.7, 130.2, 128.7, 128.6, 128.5, 127.3, 126.3, 126.0, 125.8, 125.0, 124.9, 124.6, 124.0, 122.5, 121.4, 71.7, 62.5, 57.1, 53.5, 50.0, 45.1, 42.3, 39.2, 37.3, 36.5, 32.0, 31.8, 31.6, 24.7, 22.8, 21.1, 19.4, 13.5; MS (CI, NH<sub>3</sub>) m/z 529 (100, [M + H]<sup>+</sup>); optical rotation  $[\eta]_D^{20}$  +34.0 (c 1.1, CHCl<sub>3</sub>).

**(21E)- 3 $\beta$ -acetoxy-pregna-5,21-diene-22-(1-pyrenyl)-20-one (4).** Acetic anhydride (1 mL, 5.28 mmol) 4-(dimethylamino)pyridine (30 mg, 246  $\mu$ mol) and triethylamine (343  $\mu$ L, 2.46 mmol) were successively added to a solution of **3** (1.3 g, 2.46 mmol) in 20 mL of CH<sub>2</sub>Cl<sub>2</sub>. The resulting solution was stirred for 3h at RT then 150 mL water was added and the organic products were extracted with CH<sub>2</sub>Cl<sub>2</sub> (3 x 80 mL). The combined extracts were dried over sodium sulfate, concentrated on a rotatory evaporator and subjected to column chromatography (CH<sub>2</sub>Cl<sub>2</sub>/AcOEt 98/2) to give 1.16 g (83%) of **4** as a bright yellow solid; mp 99°C; TLC (AcOEt/CH<sub>2</sub>Cl<sub>2</sub> 2:98) R<sub>f</sub> 0.9; IR (KBr, cm<sup>-1</sup>) 2938s, 1728s, 1676w, 1590s, 1371m, 1242s, 1102m, 1126m, 845s; <sup>1</sup>H NMR (CDCl<sub>3</sub>)  $\delta$  0.58 (s, 3H), 0.87 (s, 3H), 1.95 (s, 3H), 0.70-2.36 (m, 21H), 2.71 (t, J = 9 Hz, 1H), 4.52 (m, 1H), 5.24 (d, J = 4.8 Hz, 1H), 6.85 (d, J = 15.6 Hz, 1H), 7.87-8.17 (m, 8H), 8.36 (d, J = 9.6 Hz, 1H), 8.56 (d, J = 15.9 Hz, 1H); <sup>13</sup>C NMR (CDCl<sub>3</sub>)  $\delta$  200.1, 170.6, 139.6, 137.9, 132.7, 131.3, 130.7, 130.2, 128.7, 128.6, 128.5, 127.3, 126.3, 126.0, 125.8, 125.0, 124.9, 124.6, 124.0,

122.5, 122.4, 73.9, 62.4, 57.0, 49.9, 45.0, 39.1, 38.1, 37.0, 36.6, 31.9, 31.8, 27.8, 24.7, 22.8, 21.5, 21.1, 19.3, 13.5 (only 39 of the 40 expected resonances were observed); MS (CI, NH<sub>3</sub>) m/z 571 (100, [M + H]<sup>+</sup>); optical rotation [η]<sup>20</sup><sub>D</sub> +63.6 (c 0.86, CHCl<sub>3</sub>).

**3β-acetoxy-pregn-5-ene-21-(1-methylpyrenyl)-20-one (5).** To an iced cooled solution of **4** (1 g, 1.75 mmol) in 20 mL of CH<sub>2</sub>Cl<sub>2</sub>, 4.2 mL of a 1M solution of TiCl<sub>4</sub> in CH<sub>2</sub>Cl<sub>2</sub> was added and the resulting deep brown solution was stirred for 10 min. Et<sub>3</sub>SiH (419 μL, 2.63 mmol) was added all at once and the solution was warmed to room temperature and stirred for 45 min. The solution was poured into 150 mL of a saturated solution of NaHCO<sub>3</sub> and the organic products were extracted with CH<sub>2</sub>Cl<sub>2</sub> (3 x 80 mL). The combined extracts were dried over sodium sulfate, concentrated on a rotatory evaporator and subjected to column chromatography (CH<sub>2</sub>Cl<sub>2</sub>/AcOEt 98:2) to give 601 mg (60%) of **5** as a pale yellow solid; mp 91°C; TLC (CH<sub>2</sub>Cl<sub>2</sub>/AcOEt 98:2) R<sub>f</sub> 0.9; IR (KBr, cm<sup>-1</sup>) 2938s, 2902s, 1729s, 1701s, 1456w, 1436w, 1362m, 1246s, 1095w, 1031m, 906w, 845m, 731m; <sup>1</sup>H NMR (CDCl<sub>3</sub>) δ 0.49 (s, 3H), 0.86 (s, 3H), 1.94 (s, 3H), 0.6-2.4 (m, 20H), 2.77 (t, J = 8.1 Hz, 2H), 3.51 (t, J = 7.5 Hz, 2H), 4.49 (m, 1H), 5.23 (d, J = 4.2 Hz, 1H), 7.76-8.14 (m, 9H); <sup>13</sup>C NMR (CDCl<sub>3</sub>) δ 210.5, 170.5, 139.6, 135.6, 131.4, 130.9, 130.0, 128.5, 127.6, 127.5, 127.3, 126.7, 125.9, 125.1, 125.0, 124.9, 124.8, 123.0, 122.3, 73.8, 63.1, 56.7, 49.7, 46.1, 44.2, 38.8, 38.1, 36.9, 36.5, 31.7, 31.6, 27.7, 27.4, 24.5, 23.0, 21.4, 20.9, 19.2, 13.4 (only 39 of the 40 expected resonances were observed); MS (CI, NH<sub>3</sub>) m/z 590 (100, [M + NH<sub>4</sub>]<sup>+</sup>), 573 (98, [M + H]<sup>+</sup>); optical rotation [η]<sup>20</sup><sub>D</sub> -9.0 (c 1.37, CHCl<sub>3</sub>).

**3β-hydroxy-pregn-5-ene-21-(1-methylpyrenyl)-20-one (6).** We successively added 5 mL of dry methanol and 5 mL of a 30 wt. % solution of sodium methanolate in methanol to a solution of **5** (600 mg, 1 mmol) in 10 mL of CH<sub>2</sub>Cl<sub>2</sub> and stirred the solution for 4 h at room temperature. We added 200ml water and extracted the organic products with CH<sub>2</sub>Cl<sub>2</sub> (3 x 100 mL). The combined organic extracts were washed with saline solution, dried over sodium sulfate, filtered and concentrated on a rotatory evaporator. Purification by flash chromatography on silica G60 (0.040-0.063 mm), eluting with CH<sub>2</sub>Cl<sub>2</sub> in AcOEt (85/15) gave 302 mg (95%) of **6** as an off-white solid; mp 199°C (dec.); TLC (CH<sub>2</sub>Cl<sub>2</sub>/AcOEt 85:15) R<sub>f</sub> 0.5; IR (KBr, cm<sup>-1</sup>) 3428m, 2930s, 1700s, 1458w, 1436w, 1357w, 1108w, 1054m, 845s, 755s; <sup>1</sup>H NMR (CDCl<sub>3</sub>) δ 0.55 (s, 3H), 0.89 (s, 3H), 0.70-2.24 (m, 19H), 2.40 (t, J = 9 Hz, 1H), 2.84 (t, J = 6 Hz, 2H), 3.42 (m, 1H) 3.55 (t, J = 9 Hz, 2H), 5.24 (d, J = 4.8 Hz, 1H), 7.80-8.18 (m, 9H); <sup>13</sup>C NMR (CDCl<sub>3</sub>) δ 210.5, 140.7, 135.7, 131.4, 130.9, 130.0, 128.5, 127.6, 127.5, 127.3, 126.8, 125.9, 125.1, 125.0, 124.9, 124.8, 123.0, 121.4, 71.7, 63.2, 56.9, 49.9, 46.1, 44.3, 42.2, 38.9, 37.2, 36.5, 31.8, 31.7, 31.6, 27.4, 24.5,

23.0, 21.0, 19.3, 13.5 (only 37 of the 38 expected resonances were observed); MS (CI, NH<sub>3</sub>) m/z 548 (100, [M + NH<sub>4</sub>]<sup>+</sup>), 531 (17, [M + H]<sup>+</sup>); optical rotation  $[\eta]_D^{20}$  -12.1 (c 0.74, CHCl<sub>3</sub>).

**3 $\beta$ -tert-butyltrimethylsilyloxy-pregn-5-ene-21-(1-methylpyrenyl)-20-one (7).** We added via a syringe, a solution of tert-butyltrimethylsilyl chloride (68 mg, 452  $\mu$ mol) in 2 mL of CH<sub>2</sub>Cl<sub>2</sub> to a solution of **6** (200 mg, 377  $\mu$ mol) and imidazole (51 mg, 754  $\mu$ mol) in 5 mL of CH<sub>2</sub>Cl<sub>2</sub>. After 12h stirring at RT, 50 mL water was added and the organic products were extracted with dichloromethane (3 x 50 mL). The combined organic extracts were washed with saline solution, dried over sodium sulfate, filtered and concentrated on a rotatory evaporator. Purification by flash chromatography on silica G60 (0.040-0.063 mm), eluting with dichloromethane, gave 231 mg (95%) of **7** as an off-white solid; mp 100°C; TLC (CH<sub>2</sub>Cl<sub>2</sub>) R<sub>f</sub> 0.9; IR (KBr, cm<sup>-1</sup>) 2929s, 2852s, 1703s, 1461m, 1381m, 1359m, 1250m, 1183w, 1091s, 843s, 773m; <sup>1</sup>H NMR (CDCl<sub>3</sub>)  $\delta$  0.00 (s, 6H), 0.47 (s, 3H), 0.60-2.22 (m, 32H), 2.72 (t, J = 7.5 Hz, 2H), 3.39 (m, 1H), 3.49 (t, J = 7.8 Hz, 2H), 5.17 (d, J = 3.9 Hz, 1H), 7.73-8.12 (m, 9H); <sup>13</sup>C NMR (CDCl<sub>3</sub>)  $\delta$  210.4, 141.4, 135.7, 131.4, 130.9, 130.0, 128.5, 127.6, 127.5, 127.3, 126.8, 125.9, 125.1, 125.0, 124.9, 124.8, 123.1, 120.9, 72.6, 63.0, 56.7, 49.9, 46.0, 44.2, 42.8, 38.8, 37.3, 36.5, 32.1, 31.8, 31.7, 27.4, 26.2, 26.0, 25.8, 24.5, 23.0, 21.0, 19.4, 18.3, 13.4, -4.5 (only 42 of the 44 expected resonances were observed); MS (CI, CH<sub>4</sub>) m/z 645 (100, [M + H]<sup>+</sup>); optical rotation  $[\eta]_D^{20}$  -4.3 (c 0.84, CHCl<sub>3</sub>).

**3 $\beta$ -tert-butyltrimethylsilyloxy-pregn-5-ene-21-(1-methylpyrenyl)-20-methylidene (8).** NaH (48 mg, 2 mmol) was added to 3 mL of dry DMSO and the suspension was stirred and warmed to 65°C until all the sodium hydride dissolved. The solution was cooled at RT and methyltriphenylphosphonium bromide (715 mg, 2 mmol) was added in aliquots over a period of 5 min. The reaction was slightly exothermic and the solution was stirred for an additional 45 min. This solution was mixed with a solution of **7** (645 mg, 1 mmol) in 5 mL of THF and the resulting solution was stirred and warmed at 70°C for 12h. After cooling the mixture, we added 50 mL water and the organic products were extracted with dichloromethane (3 x 50 mL). The combined organic extracts were washed with saline solution, dried over sodium sulfate, filtered and concentrated on a rotatory evaporator. Purification by flash chromatography on silica G60 (0.040-0.063 mm), eluting with pentane in CH<sub>2</sub>Cl<sub>2</sub> (75/25), gave 514 mg (80%) of **8** as an off-white solid; mp 63°C; TLC (pentane/CH<sub>2</sub>Cl<sub>2</sub> 75:25) R<sub>f</sub> 0.85; IR (KBr, cm<sup>-1</sup>) 2928s, 2851s, 1636w, 1460m, 1434m, 1380w, 1249m, 1088s, 888m, 842s, 773m; <sup>1</sup>H NMR (CDCl<sub>3</sub>)  $\delta$  0.00 (s, 6H), 0.54 (s, 3H), 0.83 (s, 9H), 0.91 (s, 3H), 0.75-2.30 (m, 32H), 2.47 (m, 2H), 3.40 (m, 3H), 4.85 (s, 1H), 5.01 (s, 1H), 5.24 (d, J = 6.0 Hz, 1H), 7.77-8.20 (m, 9H); <sup>13</sup>C NMR (CDCl<sub>3</sub>)  $\delta$

149.1, 141.6, 136.8, 133.9, 133.6, 131.5, 131.0, 129.8, 128.7, 128.6, 128.5, 128.4, 127.6, 127.3, 127.2, 126.6, 125.6, 125.1, 124.9, 124.7, 123.4, 121.1, 110.1, 72.7, 56.7, 56.3, 50.3, 43.3, 42.9, 39.9, 38.8, 37.4, 36.7, 32.9, 32.3, 32.1, 31.9, 26.0, 24.3, 21.2, 19.5, 18.3, 12.9, -4.5 (only 44 of the 45 expected resonances were observed); MS (CI, NH<sub>3</sub>) m/z 660 (10, [M + NH<sub>4</sub>]<sup>+</sup>), 511 (100); optical rotation  $[\eta]_D^{20}$  -35.0 (c 0.76, CHCl<sub>3</sub>).

**3 $\beta$ -hydroxy-pregn-5-ene-21-(1-methylpyrenyl)-20-methylidene (9).** We added TBAF (2.5 mL of a 1M solution in THF) to a solution of **8** (300 mg, 466  $\mu$ mol) in THF (5 mL), and the solution was stirred and warmed at 65°C for 12h. After cooling, 100 mL of water was added and the organic products were extracted with dichloromethane (3 x 50 mL). The combined organic extracts were washed with saline solution, dried over sodium sulfate, filtered and concentrated on a rotatory evaporator. Purification by flash chromatography on silica G60 (0.040-0.063 mm), eluting with CH<sub>2</sub>Cl<sub>2</sub> in AcOEt (98/2), gave 209 mg (85%) of **9** as an off-white solid; mp 84°C; TLC (CH<sub>2</sub>Cl<sub>2</sub>/AcOEt 98:2) R<sub>f</sub> 0.4; IR (KBr, cm<sup>-1</sup>) 3364m, 2929s, 1636w, 1458w, 1434w, 1375w, 1182w, 1056m, 888m, 843s, 712w; <sup>1</sup>H NMR (CDCl<sub>3</sub>)  $\delta$  0.52 (s, 3H), 0.65-2.25 (m, 32H), 2.3-2.6 (m, H), 3.27-3.44 (m, H), 4.83 (s, 1H), 4.99 (s, 1H), 5.24 (d, J = 4.5 Hz, 1H), 7.75-8.18 (m, 9H); <sup>13</sup>C NMR (CDCl<sub>3</sub>)  $\delta$  149.1, 140.8, 136.8, 131.5, 130.9, 129.8, 128.6, 127.5, 127.3, 127.2, 126.6, 125.8, 125.1, 124.9, 124.7, 123.4, 121.6, 110.1, 71.8, 56.6, 56.3, 50.2, 43.2, 42.3, 39.9, 38.8, 37.3, 36.6, 32.9, 32.3, 31.8, 31.7, 29.7, 26.0, 24.3, 21.1, 19.4, 12.9 (only 38 of the 39 expected resonances were observed); MS (CI, NH<sub>3</sub>) m/z 546 (38, [M + NH<sub>4</sub>]<sup>+</sup>), 529 (89, [M + H]<sup>+</sup>), 217 (100); optical rotation  $[\eta]_D^{20}$  -46.8 (c 1.23, CHCl<sub>3</sub>).

## X-ray Crystallography.

Structural data presented was collected at low temperature using an oil-coated shock-cooled crystal on a Bruker-AXS CCD 1000 diffractometer with MoK $\alpha$  radiation ( $\lambda = 0.71073 \text{ \AA}$ ). The structure was solved by direct methods (1) and all non-hydrogen atoms were refined anisotropically using the least-squares method (2) on  $F^2$ .

**Figure S1:** Molecular structures of **8** with thermal ellipsoids at the 50% probability level.

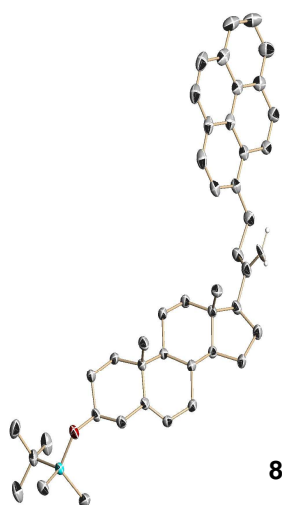

Crystal data. C<sub>45</sub>H<sub>58</sub>OSi, M = 643.00, monoclinic, P2<sub>1</sub>, a = 13.273(1) Å, b = 7.966(1) Å, c = 17.590(1) Å,  $\beta = 101.502(1)^\circ$ , V = 1822.5(3) Å<sup>3</sup>, Z = 2, T = 133(2) K. 10706 reflections (5635 independent, R<sub>int</sub> = 0.0265) were collected. Largest electron density residue: 0.309 e Å<sup>-3</sup>, R<sub>1</sub> (for I > 2(I)) = 0.0412 and wR<sub>2</sub> = 0.1028 (all data).

1. Sheldrick, G. M. 1990. Phase annealing in SHELX-90 : direct methods for larger structures. Acta crystallographica, Section A, Foundations of crystallography 46:467-473.
2. Sheldrick, G. M. 1997. Program for Crystal Structure Refinement.
